# Supplementary material
Source: PubMed Central journal article supplement (PMC9887065)
Supplement: 41598_2023_28831_MOESM1_ESM.pdf [file 41598_2023_28831_MOESM1_ESM.pdf]

| CODE         | APR DRG                                                                               | Incomes |              |          |        | Age in year (mean) |         |        | Days of hospitalisation (mean) |         |          | Severity (mean) |         |           | APR IEMA raw (mean) |         |        | In-hospital mortality (%) |         |                    |
|--------------|---------------------------------------------------------------------------------------|---------|--------------|----------|--------|--------------------|---------|--------|--------------------------------|---------|----------|-----------------|---------|-----------|---------------------|---------|--------|---------------------------|---------|--------------------|
|              |                                                                                       | 2020 n  | 2017-19 mean | % change | p*     | 2020               | 2017-19 | p**    | 2020                           | 2017-19 | p**      | 2020            | 2017-19 | p**       | 2020                | 2017-19 | p**    | 2020                      | 2017-19 | p                  |
| 044          | INTRACRANIAL HEMORRHAGE                                                               | 54      | 64           | -16      | 0.393  | 69.09              | 66.74   | 0.351  | 7.07                           | 9.17    | 0.093    | 2.26            | 2.35    | 0.542     | 0.73                | 0.86    | 0.223  | 38.90                     | 30.10   | 0.218*             |
| 045          | CVA AND PRECEREBRAL OCCLUSION WITH INFARCTION                                         | 121     | 129          | -6       | 0.910  | 70.27              | 70.22   | 0.973  | 6.53                           | 6.69    | 0.795    | 2.16            | 2.02    | 0.065     | 0.69                | 0.75    | 0.419  | 17.50                     | 7.00    | 0.001*             |
| 053          | SEIZURE                                                                               | 74      | 125          | -41      | <0.001 | 20.12              | 13.40   | 0.025  | 4.46                           | 4.26    | 0.781    | 1.82            | 1.67    | 0.137     | 0.72                | 0.77    | 0.461  | 5.40                      | 0.30    | 0.003*             |
| 058          | OTHER DISORDERS OF NERVOUS SYSTEM                                                     | 41      | 93           | -56      | <0.001 | 44.61              | 42.92   | 0.693  | 3.90                           | 5.05    | 0.392    | 1.85            | 1.69    | 0.188     | 0.52                | 0.64    | 0.353  | 7.30                      | 1.10    | 0.030 <sup>‡</sup> |
| 113          | INFECTIONS OF UPPER RESPIRATORY TRACT                                                 | 44      | 79           | -44      | <0.001 | 30.16              | 30.66   | 0.913  | 5.64                           | 4.16    | 0.041    | 1.59            | 1.66    | 0.558     | 1.29                | 0.89    | 0.023  | 0.00                      | 1.70    | 1.000*             |
| 115          | OTHER EAR, NOSE, MOUTH, THROAT AND CRANIAL OR FACIAL DIAGNOSES                        | 91      | 114          | -20      | <0.001 | 41.37              | 40.31   | 0.724  | 3.46                           | 2.62    | 0.041    | 1.34            | 1.34    | 0.994     | 0.97                | 0.77    | 0.048  | 0.00                      | 1.50    | 0.589 <sup>‡</sup> |
| 133          | RESPIRATORY FAILURE                                                                   | 109     | 101          | +8       | <0.001 | 66.49              | 61.57   | 0.071  | 7.95                           | 8.17    | 0.828    | 2.59            | 2.60    | 0.850     | 0.87                | 0.89    | 0.876  | 32.10                     | 29.90   | 0.672*             |
| 136          | RESPIRATORY MALIGNANCY                                                                | 55      | 93           | -41      | 0.003  | 65.58              | 64.25   | 0.551  | 6.45                           | 8.54    | 0.010    | 2.42            | 2.29    | 0.212     | 0.71                | 0.89    | 0.043  | 27.30                     | 30.50   | 0.637*             |
| 139          | OTHER PNEUMONIA                                                                       | 131     | 162          | -19      | 0.002  | 60.05              | 59.54   | 0.852  | 6.70                           | 6.62    | 0.870    | 2.05            | 2.13    | 0.306     | 0.87                | 0.81    | 0.395  | 8.40                      | 8.00    | 0.890*             |
| 140          | CHRONIC OBSTRUCTIVE PULMONARY DISEASE                                                 | 95      | 93           | +2       | 0.033  | 71.83              | 71.14   | 0.660  | 7.56                           | 6.30    | 0.149    | 2.56            | 2.31    | 0.004     | 0.89                | 0.76    | 0.191  | 11.60                     | 8.20    | 0.324*             |
| 143          | OTHER RESPIRATORY DIAGNOSES EXCEPT SIGNS, SYMPTOMS AND MISCELLANEOUS                  | 54      | 54           | 0        | 0.338  | 42.31              | 42.01   | 0.947  | 4.54                           | 5.30    | 0.353    | 1.74            | 1.84    | 0.474     | 0.68                | 0.75    | 0.471  | 7.40                      | 3.70    | 0.272 <sup>‡</sup> |
| 144          | RESPIRATORY SIGNS, SYMPTOMS AND MISCELLANEOUS DIAGNOSES                               | 92      | 105          | -12      | 0.040  | 55.58              | 39.58   | <0.001 | 5.30                           | 5.52    | 0.717    | 2.07            | 1.76    | 0.001     | 0.68                | 0.58    | 0.110  | 5.40                      | 2.20    | 0.110*             |
| 190          | ACUTE MYOCARDIAL INFARCTION                                                           | 45      | 54           | -17      | 0.317  | 73.84              | 72.82   | 0.656  | 5.18                           | 7.59    | 0.001    | 2.04            | 2.13    | 0.545     | 0.89                | 1.23    | 0.002  | 6.70                      | 18.50   | 0.065 <sup>‡</sup> |
| 191          | CARDIAC CATHETERIZATION FOR CORONARY ARTERY DISEASE                                   | 48      | 78           | -38      | <0.001 | 65.48              | 66.05   | 0.765  | 4.13                           | 3.80    | 0.592    | 1.42            | 1.45    | 0.711     | 0.96                | 0.83    | 0.322  | 0.00                      | 0.00    | NA                 |
| 192          | CARDIAC CATHETERIZATION FOR OTHER NON-CORONARY CONDITIONS                             | 75      | 198          | -62      | <0.001 | 58.33              | 57.94   | 0.873  | 4.64                           | 4.15    | 0.630    | 1.72            | 1.56    | 0.052     | 0.84                | 0.70    | 0.186  | 1.30                      | 0.70    | 0.450*             |
| 194          | HEART FAILURE                                                                         | 284     | 360          | -21      | <0.001 | 77.02              | 75.90   | 0.181  | 6.91                           | 7.76    | 0.034    | 2.31            | 2.26    | 0.306     | 0.82                | 0.89    | 0.119  | 17.30                     | 11.20   | 0.006*             |
| 198          | ANGINA PECTORIS AND CORONARY ATHEROSCLEROSIS                                          | 42      | 60           | -30      | 0.020  | 76.55              | 73.54   | 0.130  | 0.48                           | 0.49    | <0.001   | 2.10            | 1.86    | 0.045     | 0.75                | 1.07    | <0.001 | 4.80                      | 6.60    | 1.000*             |
| 240          | DIGESTIVE MALIGNANCY                                                                  | 55      | 66           | -17      | 0.340  | 66.45              | 66.64   | 0.947  | 8.07                           | 9.52    | 0.331    | 2.33            | 2.42    | 0.431     | 0.73                | 0.90    | 0.147  | 23.60                     | 35.20   | 0.106*             |
| 243          | OTHER ESOPHAGEAL DISORDERS                                                            | 32      | 124          | -74      | <0.001 | 16.66              | 10.37   | 0.195  | 2.19                           | 1.71    | 0.393    | 1.53            | 1.25    | 0.030     | 0.58                | 0.47    | 0.339  | 0.00                      | 0.00    | NA                 |
| 249          | OTHER GASTROENTERITIS, NAUSEA AND VOMITING                                            | 60      | 79           | -24      | 0.013  | 40.47              | 33.26   | 0.118  | 6.67                           | 5.37    | 0.257    | 2.03            | 1.85    | 0.137     | 1.00                | 0.93    | 0.529  | 5.00                      | 4.60    | 1.000*             |
| 254          | OTHER DIGESTIVE SYSTEM DIAGNOSES                                                      | 84      | 119          | -29      | 0.004  | 46.10              | 43.07   | 0.411  | 7.17                           | 4.94    | 0.146    | 1.85            | 1.52    | 0.002     | 1.10                | 0.82    | 0.050  | 4.80                      | 1.70    | 0.103 <sup>‡</sup> |
| 281          | MALIGNANCY OF HEPATOBILIARY SYSTEM AND PANCREAS                                       | 89      | 78           | +14      | 0.171  | 64.46              | 66.75   | 0.203  | 7.51                           | 9.30    | 0.095    | 2.31            | 2.43    | 0.225     | 0.77                | 0.90    | 0.180  | 23.60                     | 25.10   | 0.778*             |
| 282          | DISORDERS OF PANCREAS EXCEPT MALIGNANCY                                               | 83      | 102          | -19      | 0.244  | 58.16              | 62.77   | 0.05   | 9.88                           | 8.84    | 0.296    | 1.77            | 1.79    | 0.801     | 1.23                | 1.01    | 0.090  | 1.20                      | 3.90    | 0.315 <sup>‡</sup> |
| 283          | OTHER DISORDERS OF THE LIVER                                                          | 34      | 84           | -59      | <0.001 | 51.65              | 58.91   | 0.121  | 7.65                           | 4.21    | 0.018    | 2.03            | 1.96    | 0.571     | 0.94                | 0.55    | 0.032  | 0.00                      | 3.60    | 0.606 <sup>‡</sup> |
| 351          | OTHER MUSCULOSKELETAL SYSTEM AND CONNECTIVE TISSUE DIAGNOSES                          | 52      | 74           | -29      | 0.129  | 42.65              | 44.73   | 0.606  | 3.98                           | 3.04    | 0.157    | 1.42            | 1.34    | 0.380     | 0.74                | 0.64    | 0.382  | 0.00                      | 0.00    | NA                 |
| 385          | OTHER SKIN, SUBCUTANEOUS TISSUE AND BREAST DISORDERS                                  | 41      | 85           | -52      | <0.001 | 47.37              | 49.70   | 0.565  | 4.93                           | 2.75    | 0.001    | 1.46            | 1.21    | 0.018     | 1.16                | 0.75    | 0.109  | 2.40                      | 0.40    | 0.257*             |
| 463          | KIDNEY AND URINARY TRACT INFECTIONS                                                   | 121     | 104          | +17      | 0.003  | 47.03              | 43.05   | 0.254  | 6.31                           | 5.94    | 0.411    | 1.98            | 1.88    | 0.212     | 0.84                | 0.87    | 0.278  | 4.10                      | 2.60    | 0.394*             |
| 466          | MALFUNCTION, REACTION, COMPLICATION OF GENITOURINARY DEVICE OR PROSTHESIS             | 101     | 89           | +14      | 0.509  | 57.29              | 57.17   | 0.369  | 6.96                           | 5.77    | 0.135    | 2.87            | 2.69    | 0.010     | 0.84                | 0.78    | 0.495  | 2.90                      | 1.10    | 0.355*             |
| 468          | OTHER KIDNEY AND URINARY TRACT DIAGNOSES, SIGNS AND SYMPTOMS                          | 71      | 88           | -19      | <0.001 | 55.08              | 48.33   | 0.047  | 2.56                           | 3.02    | 0.264    | 1.58            | 1.73    | 0.110     | 0.61                | 0.65    | 0.674  | 4.20                      | 0.80    | 0.067 <sup>‡</sup> |
| 469          | ACUTE KIDNEY INJURY                                                                   | 95      | 94           | +1       | 0.101  | 67.02              | 69.22   | 0.292  | 9.19                           | 9.70    | 0.615    | 2.13            | 2.19    | 0.444     | 1.06                | 1.03    | 0.766  | 12.60                     | 11.30   | 0.728*             |
| 560          | VAGINAL DELIVERY                                                                      | 935     | 1069         | -13      | <0.001 | 30.69              | 31.06   | 0.112  | 2.95                           | 3.11    | 0.002    | 1.47            | 1.42    | 0.021     | 1.12                | 1.20    | <0.001 | 0.00                      | 0.00    | NA                 |
| 565          | FALSE LABOR                                                                           | 57      | 49           | +16      | 0.048  | 31.18              | 28.37   | 0.003  | 2.88                           | 1.61    | 0.220    | 1.25            | 1.27    | 0.739     | 1.31                | 0.72    | 0.243  | 0.00                      | 0.00    | NA                 |
| 566          | ANTEPARTUM WITHOUT O.R. PROCEDURE                                                     | 136     | 188          | -28      | 0.006  | 31.27              | 30.01   | 0.037  | 2.66                           | 2.60    | 0.829    | 1.47            | 1.51    | 0.536     | 0.76                | 0.77    | 0.943  | 0.00                      | 0.00    | NA                 |
| 640          | NEONATE BIRTH WEIGHT > 2499 GRAMS, NORMAL NEWBORN OR NEONATE WITH OTHER COMPLICATIONS | 47      | 66           | -29      | 0.067  | 0.00               | 0.00    | NA     | 6.36                           | 7.61    | 0.354    | 1.77            | 1.77    | 0.946     | 1.49                | 1.33    | 0.486  | 0.00                      | 0.00    | NA                 |
| 660          | MAJOR HEMATOLOGIC OR IMMUNOLOGIC DIAGNOSES EXCEPT SICKLE CELL CRISIS                  | 58      | 85           | -32      | 0.001  | 37.17              | 33.25   | 0.348  | 9.14                           | 8.23    | 0.426    | 2.31            | 2.09    | 0.05      | 0.94                | 1.00    | 0.624  | 1.70                      | 3.10    | 1.000*             |
| 691          | LYMPHOMA, MYELOMA AND NON-ACUTE LEUKEMIA                                              | 115     | 55           | +110     | <0.001 | 48.28              | 56.07   | 0.005  | 7.83                           | 14.69   | <0.001   | 1.73            | 2.08    | 0.001     | 0.74                | 1.25    | <0.001 | 7.80                      | 8.50    | 0.832*             |
| 696          | OTHER CHEMOTHERAPY                                                                    | 67      | 217          | -69      | <0.001 | 39.24              | 30.83   | 0.001  | 4.60                           | 4.53    | 0.828    | 1.99            | 2.02    | 0.549     | 1.01                | 0.91    | 0.360  | 0.00                      | 0.20    | 1.000*             |
| 720          | SEPTICEMIA AND DISSEMINATED INFECTIONS                                                | 98      | 127          | -23      | 0.002  | 71.05              | 68.85   | 0.281  | 10.88                          | 11.74   | 0.487    | 3.11            | 2.90    | 0.022     | 0.94                | 1.05    | 0.262  | 25.50                     | 33.70   | 0.122*             |
| 753          | BIPOLAR DISORDERS                                                                     | 73      | 44           | +67      | <0.001 | 45.21              | 45.58   | 0.864  | 12.82                          | 16.80   | 0.028    | 1.48            | 1.53    | 0.550     | 0.76                | 0.99    | 0.025  | 0.00                      | 0.00    | NA                 |
| 861          | SIGNS, SYMPTOMS AND OTHER FACTORS INFLUENCING HEALTH STATUS                           | 61      | 85           | -28      | <0.001 | 44.97              | 41.88   | 0.412  | 6.59                           | 5.22    | 0.243    | 1.89            | 1.50    | 0.043     | 0.89                | 0.79    | 0.538  | 11.50                     | 12.90   | 0.757*             |
| <b>TOTAL</b> |                                                                                       | 6229    | 7959         | -22      | <0.001 | 48.86              | 46.67   | 0.001  | 6.78                           | 6.26    | 0.031*** | 1.92            | 1.83    | <0.001*** | 0.91                | 0.92    | 0.857  | 6.80                      | 5.70    | 0.001*             |

\* Chi-Square test; \*\* Student T-test; \*\*\* Mann-Whitney U-test; <sup>‡</sup> Fisher Exact Test; NA, not applicable

|                                                                                        |
|----------------------------------------------------------------------------------------|
| Highlighted in orange when values in 2020 are significantly higher compared to 2017-19 |
| Highlighted in blue when values in 2020 are significantly lower compared to 2017-19    |

**Supplementary Table 1** Characteristics of non-COVID patients admitted for the 40 most frequent medical APR DRGs to the Virgen del Rocio University Hospital between February 27 and June 7, 2020 (first COVID-19 pandemic wave in Seville), compared with the same period in 2017-2019
