# Supplementary material
Source: PubMed Central journal article supplement (PMC9887065)
Supplement: 41598_2023_28831_MOESM2_ESM.pdf [file 41598_2023_28831_MOESM2_ESM.pdf]

| CODE         | APR DRG                                                              | Incomes |              |          |        | Age in year (mean) |         |        | Days of hospitalisation (mean) |         |           | Severity (mean) |         |           | APR IEMA raw (mean) |         |        | In-hospital mortality (%) |         |                    |
|--------------|----------------------------------------------------------------------|---------|--------------|----------|--------|--------------------|---------|--------|--------------------------------|---------|-----------|-----------------|---------|-----------|---------------------|---------|--------|---------------------------|---------|--------------------|
|              |                                                                      | 2020 n  | 2017-19 mean | % change | p*     | 2020               | 2017-19 | p**    | 2020                           | 2017-19 | p**       | 2020            | 2017-19 | p**       | 2020                | 2017-19 | p**    | 2020                      | 2017-19 | p                  |
| 021          | OPEN CRANIOTOMY EXCEPT TRAUMA 01P                                    | 148     | 163          | -9       | 0.367  | 46.58              | 49.48   | 0.199  | 13.78                          | 14.70   | 0.779     | 1.91            | 1.78    | 0.143     | 0.75                | 0.85    | 0.592  | 4.10                      | 3.90    | 0.938*             |
| 024          | OPEN EXTRACRANIAL VASCULAR PROCEDURES                                | 159     | 150          | +6       | <0.001 | 66.74              | 67.83   | 0.407  | 5.19                           | 6.08    | 0.183     | 2.48            | 2.32    | 0.058     | 0.63                | 0.68    | 0.427  | 3.10                      | 4.40    | 0.478*             |
| 097          | TONSIL AND ADENOID PROCEDURES                                        | 22      | 68           | -67      | <0.001 | 20.50              | 11.82   | 0.092  | 1.36                           | 1.47    | 0.674     | 1.18            | 1.10    | 0.479     | 0.95                | 0.80    | 0.332  | 0.00                      | 0.00    | NA                 |
| 098          | OTHER EAR, NOSE, MOUTH AND THROAT PROCEDURES                         | 109     | 186          | -41      | <0.001 | 49.84              | 42.32   | 0.001  | 4.36                           | 3.75    | 0.329     | 1.38            | 1.26    | 0.054     | 1.11                | 0.97    | 0.268  | 0.00                      | 0.00    | NA                 |
| 120          | MAJOR RESPIRATORY AND CHEST PROCEDURES                               | 42      | 40           | +4       | 0.906  | 63.02              | 57.23   | 0.060  | 4.45                           | 7.00    | 0.002     | 1.55            | 1.60    | 0.650     | 0.63                | 0.90    | 0.004  | 2.40                      | 0.80    | 0.450 <sup>†</sup> |
| 121          | OTHER RESPIRATORY AND CHEST PROCEDURES                               | 38      | 52           | -27      | 0.183  | 52.47              | 50.75   | 0.690  | 3.34                           | 6.72    | <0.001    | 1.55            | 1.55    | 0.968     | 1.17                | 1.62    | 0.002  | 0.00                      | 0.60    | 1.000 <sup>†</sup> |
| 163          | CARDIAC VALVE PROCEDURES WITHOUT AMI OR COMPLEX PRINCIPAL DIAGNOSIS  | 58      | 66           | -13      | 0.001  | 60.88              | 63.44   | 0.312  | 17.33                          | 16.16   | 0.560     | 2.21            | 2.13    | 0.522     | 1.13                | 1.05    | 0.413  | 1.70                      | 5.00    | 0.465 <sup>†</sup> |
| 171          | PERMANENT CARDIAC PACEMAKER IMPLANT WITHOUT AMI, HEART FAILURE OR S  | 89      | 108          | -18      | 0.113  | 77.51              | 75.66   | 0.207  | 4.97                           | 4.76    | 0.754     | 1.71            | 1.57    | 0.084     | 0.89                | 0.95    | 0.566  | 2.20                      | 0.00    | 0.046*             |
| 174          | PERCUTANEOUS CARDIAC INTERVENTION WITH AMI                           | 129     | 123          | +5       | 0.339  | 63.44              | 63.97   | 0.671  | 4.41                           | 6.37    | <0.001    | 1.60            | 1.59    | 0.812     | 0.87                | 1.10    | <0.001 | 1.60                      | 1.70    | 1.000 <sup>†</sup> |
| 175          | PERCUTANEOUS CARDIAC INTERVENTION WITHOUT AMI                        | 133     | 271          | -51      | <0.001 | 62.81              | 63.04   | 0.897  | 4.98                           | 5.58    | 0.330     | 1.64            | 1.85    | 0.010     | 1.15                | 1.14    | 0.931  | 0.80                      | 0.60    | 0.583 <sup>†</sup> |
| 226          | ANAL AND PERINEAL PROCEDURES                                         | 17      | 72           | -76      | <0.001 | 49.00              | 49.59   | 0.891  | 2.88                           | 3.38    | 0.581     | 1.12            | 1.19    | 0.498     | 1.29                | 1.33    | 0.890  | 0.00                      | 0.50    | 1.000*             |
| 227          | HERNIA PROCEDURES EXCEPT INGUINAL, FEMORAL AND UMBILICAL             | 26      | 97           | -73      | <0.001 | 60.54              | 57.64   | 0.349  | 4.27                           | 3.81    | 0.589     | 1.35            | 1.41    | 0.584     | 1.13                | 0.89    | 0.127  | 0.00                      | 0.70    | 1.000*             |
| 228          | INGUINAL, FEMORAL AND UMBILICAL HERNIA PROCEDURES                    | 42      | 125          | -66      | <0.001 | 52.6               | 56.22   | 0.353  | 3.14                           | 1.75    | 0.017     | 1.36            | 1.27    | 0.373     | 1.36                | 0.86    | <0.001 | 0.00                      | 0.00    | NA                 |
| 230          | MAJOR SMALL BOWEL PROCEDURES                                         | 75      | 89           | -15      | 0.100  | 55.87              | 60.04   | 0.169  | 13.87                          | 14.35   | 0.824     | 1.95            | 2.07    | 0.371     | 0.93                | 0.89    | 0.659  | 6.70                      | 5.60    | 0.755*             |
| 231          | MAJOR LARGE BOWEL PROCEDURES                                         | 112     | 99           | +14      | 0.190  | 65.06              | 64.50   | 0.749  | 12.24                          | 10.43   | 0.381     | 1.81            | 1.65    | 0.093     | 0.93                | 0.91    | 0.780  | 2.70                      | 1.50    | 0.671 <sup>†</sup> |
| 234          | APPENDECTOMY WITHOUT COMPLEX PRINCIPAL DIAGNOSIS                     | 68      | 95           | -28      | <0.001 | 24.66              | 25.20   | 0.846  | 3.43                           | 2.99    | 0.366     | 1.09            | 1.03    | 0.186     | 1.16                | 0.96    | 0.202  | 0.00                      | 0.00    | NA                 |
| 260          | MAJOR PANCREAS, LIVER AND SHUNT PROCEDURES                           | 42      | 45           | -7       | <0.001 | 62.29              | 60.68   | 0.533  | 17.21                          | 14.16   | 0.347     | 2.12            | 2.06    | 0.696     | 1.21                | 1.02    | 0.328  | 0.00                      | 2.20    | 1.000*             |
| 263          | CHOLECYSTECTOMY                                                      | 67      | 132          | -49      | <0.001 | 60.25              | 57.07   | 0.132  | 4.10                           | 2.76    | 0.008     | 1.49            | 1.40    | 0.363     | 1.27                | 0.86    | 0.021  | 1.50                      | 0.40    | 0.346*             |
| 301          | HIP JOINT REPLACEMENT                                                | 107     | 141          | -24      | 0.063  | 75.87              | 70.71   | 0.003  | 6.80                           | 6.11    | 0.080     | 1.39            | 1.32    | 0.270     | 0.94                | 0.82    | 0.023  | 5.60                      | 1.90    | 0.032*             |
| 302          | KNEE JOINT REPLACEMENT                                               | 49      | 193          | -75      | <0.001 | 70.12              | 69.80   | 0.821  | 4.41                           | 4.53    | 0.839     | 1.16            | 1.21    | 0.487     | 1.03                | 0.93    | 0.142  | 0.00                      | 0.20    | 1.000 <sup>†</sup> |
| 305          | AMPUTATION OF LOWER LIMB EXCEPT TOES                                 | 52      | 71           | -27      | 0.089  | 71.85              | 67.80   | 0.031  | 71.85                          | 67.80   | 0.865     | 9.13            | 9.36    | 0.813     | 0.63                | 0.63    | 0.993  | 7.70                      | 3.30    | 0.234 <sup>†</sup> |
| 308          | HIP AND FEMUR FRACTURE REPAIR                                        | 122     | 132          | -8       | 0.722  | 79.98              | 75.28   | 0.003  | 6.50                           | 7.19    | 0.113     | 1.98            | 1.85    | 0.092     | 0.72                | 0.78    | 0.141  | 3.30                      | 3.10    | 1.000 <sup>†</sup> |
| 309          | OTHER SIGNIFICANT HIP AND FEMUR SURGERY                              | 24      | 62           | -61      | <0.001 | 30.58              | 37.52   | 0.254  | 8.63                           | 7.02    | 0.398     | 1.75            | 1.47    | 0.181     | 0.73                | 0.80    | 0.753  | 0.00                      | 0.80    | 1.000*             |
| 310          | VERTEBRAL AND INTERVERTEBRAL SPINAL PROCEDURES INCLUDING DISC PROCE  | 39      | 69           | -44      | 0.001  | 49.77              | 48.79   | 0.744  | 6.56                           | 4.69    | 0.249     | 1.41            | 1.38    | 0.187     | 0.99                | 0.69    | 0.067  | 0.00                      | 0.00    | NA                 |
| 313          | KNEE AND LOWER LEG PROCEDURES EXCEPT FOOT                            | 100     | 139          | -28      | 0.028  | 49.21              | 45.53   | 0.090  | 6.33                           | 5.88    | 0.636     | 1.50            | 1.37    | 0.058     | 1.07                | 0.99    | 0.499  | 0.00                      | 0.30    | 1.000*             |
| 314          | FOOT AND TOE PROCEDURES                                              | 29      | 68           | -57      | <0.001 | 45.86              | 49.62   | 0.339  | 3.72                           | 4.25    | 0.597     | 1.48            | 1.50    | 0.855     | 0.85                | 0.89    | 0.828  | 0.00                      | 0.00    | NA                 |
| 315          | SHOULDER, UPPER ARM AND FOREARM PROCEDURES EXCEPT JOINT REPLACEMEN   | 94      | 124          | -24      | <0.001 | 54.54              | 53.22   | 0.604  | 3.14                           | 3.21    | 0.848     | 1.47            | 1.42    | 0.397     | 0.92                | 0.96    | 0.671  | 0.00                      | 0.00    | NA                 |
| 320          | OTHER MUSCULOSKELETAL SYSTEM AND CONNECTIVE TISSUE PROCEDURES        | 48      | 86           | -44      | 0.002  | 55.79              | 42.95   | <0.001 | 5.29                           | 4.45    | 0.361     | 1.40            | 1.40    | 0.948     | 1.01                | 0.76    | 0.073  | 2.10                      | 0.80    | 0.401 <sup>†</sup> |
| 361          | SKIN GRAFT FOR SKIN AND SUBCUTANEOUS TISSUE DIAGNOSES                | 47      | 76           | -38      | 0.021  | 63.26              | 58.40   | 0.139  | 5.70                           | 5.67    | 0.987     | 1.55            | 1.33    | 0.063     | 0.70                | 0.92    | 0.308  | 0.00                      | 0.40    | 1.000 <sup>†</sup> |
| 362          | MASTECTOMY PROCEDURES                                                | 60      | 72           | -17      | 0.648  | 53.92              | 52.56   | 0.471  | 4.35                           | 4.29    | 0.930     | 1.17            | 1.20    | 0.575     | 1.17                | 1.15    | 0.721  | 0.00                      | 0.00    | NA                 |
| 363          | BREAST PROCEDURES EXCEPT MASTECTOMY                                  | 68      | 145          | -53      | <0.001 | 58.12              | 53.74   | 0.003  | 2.15                           | 2.87    | 0.037     | 1.18            | 1.24    | 0.229     | 0.85                | 0.99    | 0.155  | 0.00                      | 0.00    | NA                 |
| 364          | OTHER SKIN, SUBCUTANEOUS TISSUE AND RELATED PROCEDURES               | 51      | 49           | +5       | 0.105  | 57.94              | 51.25   | 0.021  | 5.61                           | 5.15    | 0.837     | 1.14            | 1.29    | 0.041     | 0.75                | 1.03    | 0.281  | 2.00                      | 0.00    | 0.259 <sup>†</sup> |
| 440          | KIDNEY TRANSPLANT                                                    | 12      | 60           | -80      | <0.001 | 34.50              | 51.40   | 0.025  | 15.08                          | 16.39   | 0.743     | 2.17            | 2.12    | 0.851     | 0.99                | 1.06    | 0.753  | 0.00                      | 0.00    | NA                 |
| 442          | KIDNEY AND URINARY TRACT PROCEDURES FOR MALIGNANCY                   | 43      | 40           | +7       | 0.201  | 61.65              | 62.45   | 0.865  | 5.21                           | 5.98    | 0.180     | 1.58            | 1.48    | 0.405     | 0.86                | 0.96    | 0.296  | 2.30                      | 0.80    | 0.457 <sup>†</sup> |
| 443          | KIDNEY AND URINARY TRACT PROCEDURES FOR NON-MALIGNANCY               | 75      | 89           | -15      | 0.104  | 50.37              | 44.90   | 0.091  | 4.96                           | 5.95    | 0.363     | 1.64            | 1.49    | 0.145     | 0.86                | 1.07    | 0.039  | 1.30                      | 1.10    | 1.000*             |
| 446          | URETHRAL AND TRANSURETHRAL PROCEDURES                                | 89      | 158          | -44      | <0.001 | 69.65              | 67.33   | 0.146  | 2.62                           | 2.57    | 0.849     | 1.54            | 1.37    | 0.015     | 0.91                | 0.88    | 0.607  | 0.00                      | 0.00    | NA                 |
| 513          | UTERINE AND ADNEXA PROCEDURES FOR NON-MALIGNANCY EXCEPT LEIOMYOMA    | 55      | 99           | -44      | <0.001 | 50.91              | 50.75   | 0.947  | 2.38                           | 2.69    | 0.509     | 1.22            | 1.19    | 0.649     | 0.73                | 0.82    | 0.446  | 0.00                      | 0.30    | 1.000*             |
| 540          | CESAREAN SECTION WITHOUT STERILIZATION                               | 377     | 346          | +9       | 0.465  | 32.24              | 32.50   | 0.476  | 4.81                           | 5.03    | 0.418     | 1.51            | 1.58    | 0.084     | 1.06                | 1.07    | 0.813  | 0.00                      | 0.10    | 1.000 <sup>†</sup> |
| 950          | EXTENSIVE O.R. PROCEDURE UNRELATED TO PRINCIPAL DIAGNOSIS            | 57      | 86           | -33      | 0.021  | 54.18              | 53.99   | 0.952  | 13.49                          | 10.06   | 0.188     | 2.21            | 2.06    | 0.261     | 0.89                | 0.87    | 0.931  | 1.80                      | 4.30    | 0.701 <sup>†</sup> |
| 951          | MODERATELY EXTENSIVE O.R. PROCEDURE UNRELATED TO PRINCIPAL DIAGNOSIS | 48      | 83           | -42      | <0.001 | 40.83              | 50.04   | 0.017  | 5.42                           | 7.91    | 0.176     | 1.71            | 1.78    | 0.573     | 0.69                | 0.96    | 0.107  | 0.00                      | 4.00    | 0.375 <sup>†</sup> |
| <b>TOTAL</b> |                                                                      | 5893    | 11470        | -33      | <0.001 | 54.76              | 52.77   | 0.008  | 8.65                           | 6.97    | <0.001*** | 1.77            | 1.58    | <0.001*** | 0.98                | 0.94    | 0.101  | 2.00                      | 1.50    | 0.026*             |

\* Chi-Square test; \*\* Student T-test; \*\*\* Mann-Whitney U-test; <sup>†</sup> Fisher Exact Test; NA, not applicable

|                                                                                        |
|----------------------------------------------------------------------------------------|
| Highlighted in orange when values in 2020 are significantly higher compared to 2017-19 |
| Highlighted in blue when values in 2020 are significantly lower compared to 2017-19    |

**Supplementary Table 2** Characteristics of non-COVID patients admitted for the 40 most frequent surgical APR DRGs to the Virgen del Rocío University Hospital between February 27 and June 7, 2020 (first COVID-19 pandemic wave in Seville), compared with the same period in 2017-2019.
